# Supplementary material
Source: PubMed Central journal article supplement (PMC3055709)
Supplement: tableS1.pdf [file tableS1.pdf]

Supplemental Table 1. *Sequence of primers used to quantify gene expression.*

| Gene           | Sequence*                                                                      | Amplicon<br>Size (bp) | Annealing<br>Temp (°C) | Accession<br>Number |
|----------------|--------------------------------------------------------------------------------|-----------------------|------------------------|---------------------|
| ApoAIV         | 5'-gca tct agc cca gga aac tg-3'<br>5'-atg tat ggg gtc agc tgg ag-3'           | 78                    | 50                     | NM_007468           |
| Elovl2         | 5'acc aga tta ttc ctg ctc gcc agt-3'<br>5'tga gct gcc act gtt gat ctg cta-3'   | 142                   | 60                     | NM_019423           |
| Fasn           | 5'-tgc cag cgt gca atg atg-3'<br>5'-cct ttg aag tcg aag aag aga-3'             | 52                    | 54                     | NM_007988           |
| Gstm3          | 5'-aag cac aac ctg tgt gga gag aca-3'<br>5'-agc tgt atg cgg gtg tcc ata act-3' | 86                    | 60                     | NM_010359           |
| Lcn13          | 5'-aca atg gta ccc tac cca gtc aca-3'<br>5'-act cac ggc aat gac cat tgt tcc-3' | 123                   | 59                     | NM_153558           |
| Lpl            | 5'-acg agc gct cca ttc atc tct tca-3'<br>5'-tct tgc tgc ttc tct tgg ctc tga-3' | 180                   | 60                     | NM_008509           |
| Scd1           | 5'-ttc ttg cga tac act ctg gtg c-3'<br>5'cgg gat tga atg ttc ttg tcg t-3'      | 98                    | 59.5                   | NM_009127           |
| SerpinA1       | 5'-att gcc aca gcc ttt gct atg ctc-3'<br>5'-ttt gtg tga ggt tga act gca ggc-3' | 91                    | 60                     | NM_009243           |
| $\beta$ -actin | 5'-agt gtg acg ttg aca tcc gta-3'<br>5'-gcc aga gca gta atc tcc ttc t-3'       | 112                   | 55                     | NM_007393           |

\* Shown as forward primer followed by reverse primer
