# Supplementary material
Source: PubMed Central journal article supplement (PMC3055709)
Supplement: tableS2.pdf [file tableS2.pdf]

Supplemental Table 2. *Hepatic fatty acid content ( $\mu\text{mol/g}$ ) for controls and LCNs fed each of the experimental diets.* Data shown is the mean ( $\pm\text{SEM}$ ) of 6-7 animals per group. Significance of difference was evaluated using two-way ANOVA ( $p < 0.05$ ;  $t$ -test).

| <b>Fatty acid class</b> | <b>Genotype</b> | <b>Lard</b><br>$\mu\text{mol/g}$ (SEM) | <b>Canola</b><br>$\mu\text{mol/g}$ (SEM) | <b>Fishfungal</b><br>$\mu\text{mol/g}$ (SEM) | <b>Significance</b><br>( $p$ ) |
|-------------------------|-----------------|----------------------------------------|------------------------------------------|----------------------------------------------|--------------------------------|
| <b>SFA</b>              | Ctrl            | 64.3 (6.0)                             | 73.8 (11.3)                              | 39.0 (2.2)                                   | Diet <0.0001                   |
|                         | LCN             | 93.5 (4.3)                             | 105.6 (6.8)                              | 73.0 (4.5)                                   | Geno <0.0001<br>D*G NS         |
| <b>MUFA</b>             | Ctrl            | 131.1(22.5)                            | 133.7 (30.3)                             | 17.3 (2.5)                                   | Diet <0.0001                   |
|                         | LCN             | 224.6 (14.7)                           | 257.1 (24.7)                             | 77.8 (11.9)                                  | Geno <0.0001<br>D*G NS         |
| <b>PUFA</b>             | Ctrl            | 14.0 (2.8)                             | 30.4 (5.3)                               | 5.4 (0.8)                                    | Diet <0.0001                   |
|                         | LCN             | 31.2 (2.0)                             | 55.6 (4.8)                               | 17.7 (1.4)                                   | Geno <0.0001<br>D*G NS         |
| <b>HUFA</b>             | Ctrl            | 16.2 (1.2)                             | 24.6 (1.4)                               | 34.0 (1.2)                                   | Diet <0.0001                   |
|                         | LCN             | 18.8 (0.8)                             | 21.5 (2.8)                               | 82.7 (6.5)                                   | Geno <0.0001<br>D*G <0.0001    |
| <b>TOTAL FA</b>         | Ctrl            | 228.2 (28.1)                           | 264.5 (44.5)                             | 96.9 (5.0)                                   | Diet <0.0001                   |
|                         | LCN             | 374.1 (18.6)                           | 444.0 (32.5)                             | 254.9 (23.0)                                 | Geno <0.0001<br>D*G NS         |
