# Supplementary material
Source: PubMed Central journal article supplement (PMC3055709)
Supplement: tableS3.pdf [file tableS3.pdf]

Supplemental Table 3. *Gene Set Enrichment Analysis (GSEA) by diet.*

| <i>Metabolic Pathways</i>                        | FF/L           | FF/C          | C/L           |
|--------------------------------------------------|----------------|---------------|---------------|
| CHOLESTEROL_BIOSYNTHESIS                         | 0.00791/-2.365 | 0.0281/-2.337 | 0.0465/-2.039 |
| HSA00100_BIOSYNTHESIS_OF_STEROIDS                | 0.0181/-2.230  | 0.118/-1.992  | 0.0354/-2.195 |
| CERAMIDEPATHWAY                                  | 0.0219/-2.165  | 0.0777/-2.078 | 0.0579/-1.989 |
| HSA00071_FATTY_ACID_METABOLISM                   | 0.873/-0.706   | 0.0012/-2.835 | 0.514/1.764   |
| HSA04920_ADIPOCYTOKINE_SIGNALING_PATHWAY         | 0.00426/-2.526 | 0.544/-1.229  | 0.313/-1.340  |
| HSA01040_POLYUNSATURATED_FATTY_ACID_BIOSYNTHESIS | 0.0466/-1.963  | 0.038/-2.242  | 0.512/-1.088  |
| HSA00190_OXIDATIVE_PHOSPHORYLATION               | 0.36/1.747     | 0.142/-1.931  | 0.033/2.395   |
| AMINOACYL_TRNA_BIOSYNTHESIS                      | 0.019/-2.197   | 0.627/-1.074  | 0.384/-1.221  |
| KERATAN_SULFATE_BIOSYNTHESIS                     | 0.00467/-2.492 | 0.571/-1.151  | 0.0337/-2.195 |
| HSA00510_N_GLYCAN_BIOSYNTHESIS                   | 0.0879/-1.769  | 0.855/1.007   | 0.0446/-2.055 |
| N_GLYCAN_BIOSYNTHESIS                            | 0.0251/-2.134  | 0.962/0.652   | 0.04/-2.106   |
| HSA01030_GLYCAN_STRUCTURES_BIOSYNTHESIS_1        | 0.175/-1.554   | 0.921/0.858   | 0.0311/-2.164 |
| HSA00230_PURINE_METABOLISM                       | 0.139/-1.643   | 0.883/0.941   | 0.043/-2.090  |
| HSA00310_LYSINE_DEGRADATION                      | 0.283/-1.330   | 0.0474/-2.191 | 1/0.602       |
| HSA00280_VALINE_LEUCINE_AND_ISOLEUCINE_DEGRAD    | 0.85/-0.742    | 0.0287/-2.316 | 0.655/1.773   |
| HSA00650_BUTANOATE_METABOLISM                    | 0.691/-0.890   | 0.0374/-2.351 | 0.95/1.304    |
| <i>Regulation of Metabolism</i>                  |                |               |               |
| PPARAPATHWAY                                     | 0.0108/-2.314  | 0.0122/-2.578 | 0.509/-1.085  |
| ST_JNK_MAPK_PATHWAY                              | 0.00169/-2.711 | 0.358/-1.573  | 0.218/-1.514  |
| SIG_INSULIN_RECEPTOR_PATHWAY_IN_CARDIAC_MYOCYTES | 0.00433/-2.578 | 0.491/-1.287  | 0.0828/-1.883 |
| GHPATHWAY                                        | 0.00163/-3.087 | 0.257/-1.692  | 0.26/-1.438   |
| PHOSPHATIDYLINOSITOL_SIGNALING_SYSTEM            | 0.00423/-2.541 | 0.363/-1.442  | 0.15/-1.657   |
| PDGFPATHWAY                                      | 0.00662/-2.424 | 0.822/-0.844  | 0.0862/-1.855 |
| CXCR4PATHWAY                                     | 0.00664/-2.416 | 0.433/-1.368  | 0.207/-1.531  |
| TPOPATHWAY                                       | 0.0181/-2.221  | 0.435/-1.364  | 0.081/-1.898  |
| SPPAPATHWAY                                      | 0.0772/-1.812  | 0.865/1.257   | 0.0117/-2.411 |
| EDG1PATHWAY                                      | 0.00786/-2.360 | 0.425/-1.381  | 0.3/-1.364    |
| HSA04910_INSULIN_SIGNALING_PATHWAY               | 0.0225/-2.165  | 0.543/-1.212  | 0.0865/-1.848 |
| BIOPEPTIDESPATHWAY                               | 0.00803/-2.384 | 0.746/-0.935  | 0.35/-1.269   |
| SIG_PIP3_SIGNALING_IN_CARDIAC_MYOCYTES           | 0.0306/-2.079  | 0.791/-0.893  | 0.0868/-1.860 |
| MTA3PATHWAY                                      | 0.0362/-2.037  | 0.46/-1.331   | 0.186/-1.573  |
| INSULINPATHWAY                                   | 0.0414/-2.003  | 0.994/0.544   | 0.0818/-1.892 |
| PROSTAGLANDIN_SYNTHESIS_REGULATION               | 0.176/-1.551   | 0.697/-0.997  | 0.0342/-2.140 |
| G_PROTEIN_SIGNALING                              | 0.274/-1.351   | 0.88/-0.790   | 0.0257/-2.264 |
| HSA03320_PPAR_SIGNALING_PATHWAY                  | 0.628/-0.961   | 0.0387/-2.253 | 0.322/1.967   |
| SIG_CD40PATHWAYMAP                               | 0.039/-2.017   | 0.571/-1.149  | 0.471/-1.133  |
| SA_PTEN_PATHWAY                                  | 0.277/-1.347   | 0.964/0.739   | 0.0435/-2.072 |
| NUCLEAR_RECEPTORS                                | 0.465/-1.113   | 0.0312/-2.344 | 0.982/1.229   |
| AKTPATHWAY                                       | 0.0417/-2.004  | 0.622/-1.091  | 0.745/-0.871  |

### *Inflammation/Infection*

|                                                     |                 |               |                |
|-----------------------------------------------------|-----------------|---------------|----------------|
| HSA04670_LEUKOCYTE_TRANSENDOTHELIAL_MIGRAT          | 0.0308/-2.081   | 0.827/1.073   | 0/-2.886       |
| IL6PATHWAY                                          | 0.0441/-1.981   | 0.867/0.971   | 0/-2.853       |
| HSA05131_PATHOGENIC_ESCHERICHIA_COLI_INFECTION_EPEC | 0.000655/-2.781 | 0.749/-0.936  | 0.00431/-2.558 |
| HSA05130_PATHOGENIC_ESCHERICHIA_COLI_INFECTION_EHEC | 0.00109/-2.822  | 0.736/-0.956  | 0.00421/-2.604 |
| MAPKPATHWAY                                         | 0.000819/-2.799 | 0.14/-1.924   | 0.12/-1.735    |
| INTRINSICPATHWAY                                    | 0.00451/-2.503  | 0.871/1.532   | 0.00773/-2.497 |
| STAT3PATHWAY                                        | 0.00468/-2.526  | 0.353/-1.473  | 0.0395/-2.113  |
| HSA05211_RENAL_CELL_CARCINOMA                       | 0.00798/-2.381  | 0.696/-0.999  | 0.0124/-2.380  |
| ST_T_CELL_SIGNAL_TRANSDUCTION                       | 0.0274/-2.110   | 0.962/0.676   | 0.179/-1.584   |
| IL2RBPATHWAY                                        | 0.0175/-2.218   | 0.797/-0.885  | 0.0126/-2.385  |
| ST_TYPE_I_INTERFERON_PATHWAY                        | 0.00884/-2.344  | 0.367/-1.528  | 0.0664/-1.952  |
| HSA05212_PANCREATIC_CANCER                          | 0.00733/-2.398  | 0.364/-1.485  | 0.0856/-1.847  |
| HSA04115_P53_SIGNALING_PATHWAY                      | 0.0658/-1.876   | 0.0122/-2.509 | 0.338/-1.300   |
| HSA04610_COMPLEMENT_AND_COAGULATION_CASCADES        | 0.282/-1.329    | 0.247/2.018   | 0.00398/-2.566 |
| IL4PATHWAY                                          | 0.00794/-2.372  | 0.538/-1.225  | 0.0824/-1.887  |
| HSA05220_CHRONIC_MYELOID_LEUKEMIA                   | 0.00659/-2.431  | 0.363/-1.565  | 0.178/-1.599   |
| IL22BPPATHWAY                                       | 0.018/-2.219    | 0.556/-1.198  | 0.0857/-1.859  |
| ST_INTERLEUKIN_4_PATHWAY                            | 0.0486/-1.955   | 0.961/0.753   | 0.0422/-2.066  |
| IL3PATHWAY                                          | 0.029/-2.094    | 0.905/-0.749  | 0.0856/-1.865  |
| ST_B_CELL_ANTIGEN_RECEPTOR                          | 0.0706/-1.841   | 0.979/0.762   | 0.0336/-2.176  |
| BLOOD_CLOTTING_CASCADE                              | 0.0657/-1.865   | 0.859/1.133   | 0.0427/-2.086  |
| CLASSICPATHWAY                                      | 0.926/1.444     | 0.0796/2.220  | 0.0349/-2.179  |
| RELAPATHWAY                                         | 0.0188/-2.195   | 0.376/-1.431  | 0.417/-1.186   |
| ST_P38_MAPK_PATHWAY                                 | 0.0374/-2.028   | 0.46/-1.336   | 0.306/-1.355   |
| SIG_IL4RECEPTOR_IN_B_LYPHOCYTES                     | 0.135/-1.650    | 0.865/-0.804  | 0.0472/-2.042  |
| BREAST_CANCER_ESTROGEN_SIGNALING                    | 0.194/-1.510    | 0.963/0.719   | 0.0323/-2.155  |
| IL2PATHWAY                                          | 0.261/-1.380    | 0.845/1.232   | 0.0428/-2.070  |
| IL10PATHWAY                                         | 0.678/-0.900    | 0.706/1.430   | 0.0298/-2.232  |
| ST_T_CELL_SIGNAL_TRANSDUCTION                       | 0.0274/-2.110   | 0.962/0.676   | 0.179/-1.584   |

---

### *Cell Cycle/Cell Division*

|                          |                |              |               |
|--------------------------|----------------|--------------|---------------|
| DNA_REPLICATION_REACTOME | 0.0331/-2.059  | 0.933/0.896  | 0.0312/-2.174 |
| HSA04110_CELL_CYCLE      | 0.00547/-2.454 | 0.263/-1.677 | 0.0726/-1.934 |
| CELL_CYCLE_KEGG          | 0.013/-2.284   | 0.541/-1.228 | 0.125/-1.723  |
| HSA03030_DNA_POLYMERASE  | 0.0652/-1.876  | 0.746/-0.941 | 0.0423/-2.082 |
| APOPTOSIS                | 0.0284/-2.094  | 0.553/-1.186 | 0.142/-1.689  |

---

### *Cell Structure/Adhesion*

|                          |               |             |                |
|--------------------------|---------------|-------------|----------------|
| RIBOSOMAL_PROTEINS       | 0/3.008       | 0/3.341     | 0.00432/-2.578 |
| HSA03010_RIBOSOME        | 0/3.211       | 0/3.742     | 0.00435/-2.625 |
| MRNA_PROCESSING_REACTOME | 0.0183/-2.207 | 0.815/1.199 | 0/-2.936       |

|                                      |                 |              |                |
|--------------------------------------|-----------------|--------------|----------------|
| HSA04510_FOCAL_ADHESION              | 0.000813/-2.919 | 0.695/-1.005 | 0.0323/-2.175  |
| HSA04530_TIGHT_JUNCTION              | 0.00471/-2.590  | 0.732/-0.956 | 0.00544/-2.629 |
| HSA04514_CELL_ADHESION_MOLECULES     | 0.0246/-2.140   | 0.691/1.502  | 0.0124/-2.417  |
| KERATINOCYTEPATHWAY                  | 0.0184/-2.223   | 0.361/-1.524 | 0.0575/-1.985  |
| ST_GA13_PATHWAY                      | 0.0213/-2.165   | 0.925/0.844  | 0.0312/-2.219  |
| SMOOTH_MUSCLE_CONTRACTION            | 0.192/-1.517    | 0.604/1.772  | 0.00765/-2.486 |
| ECMPATHWAY                           | 0.034/-2.051    | 0.607/-1.106 | 0.0527/-2.014  |
| INTEGRIN_MEDIATED_CELL_ADHESION_KEGG | 0.0176/-2.240   | 0.355/-1.468 | 0.185/-1.573   |
| ST_INTEGRIN_SIGNALING_PATHWAY        | 0.0253/-2.129   | 0.595/-1.118 | 0.144/-1.676   |
| HSA04512_ECM_RECEPTOR_INTERACTION    | 0.0315/-2.070   | 0.964/0.742  | 0.313/-1.338   |

---

Statistically significantly enriched pathways and other gene sets in dietary comparisons as identified by Gene set enrichment analysis. Comparisons include Fish fungal versus Lard, Fish fungal versus Canola, and Canola versus Lard. The numbers indicate FDR  $q$ -value for the pathway (gene set)/normalized enrichment score (NES).
