# Supplementary material
Source: PubMed Central journal article supplement (PMC3055709)

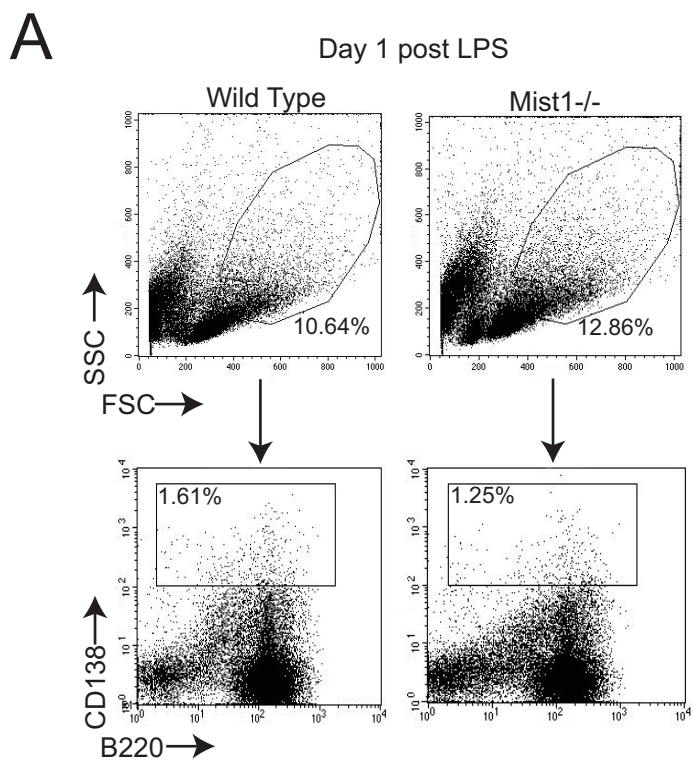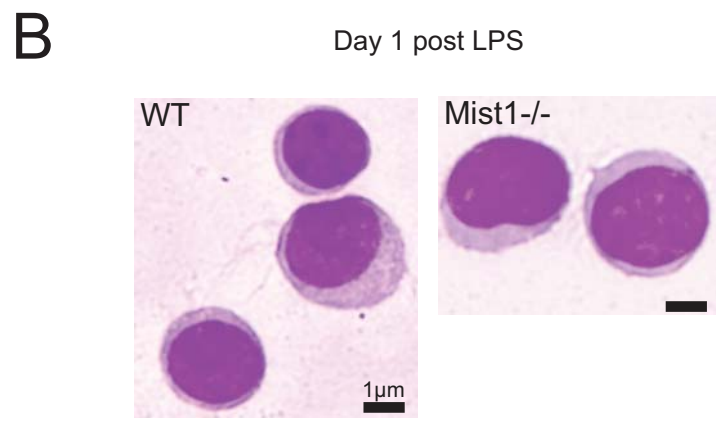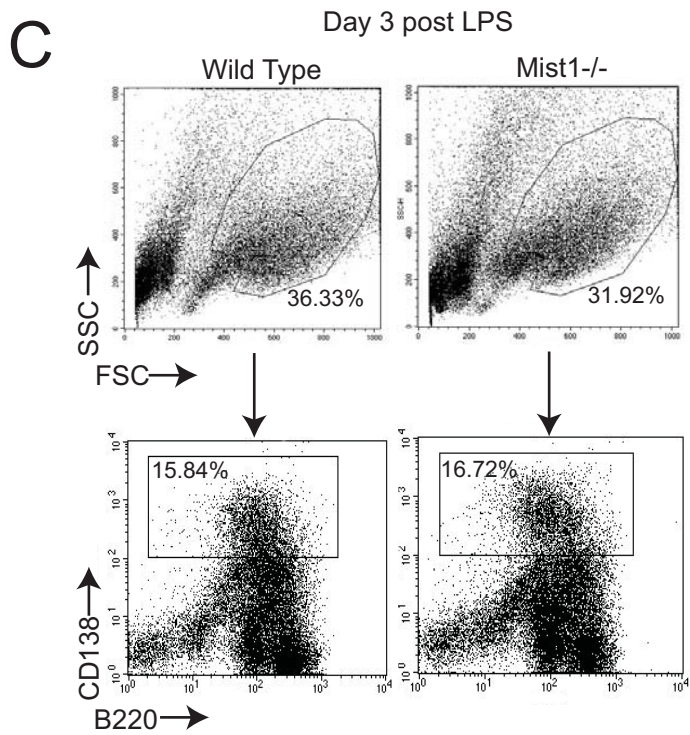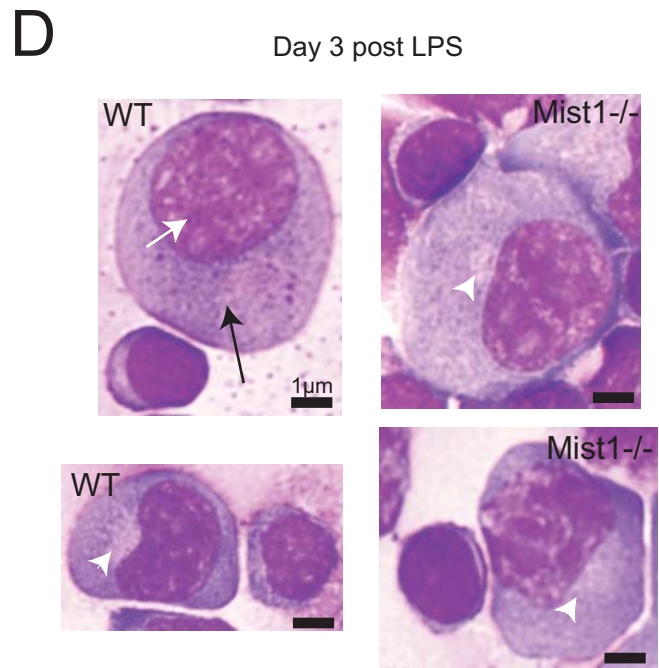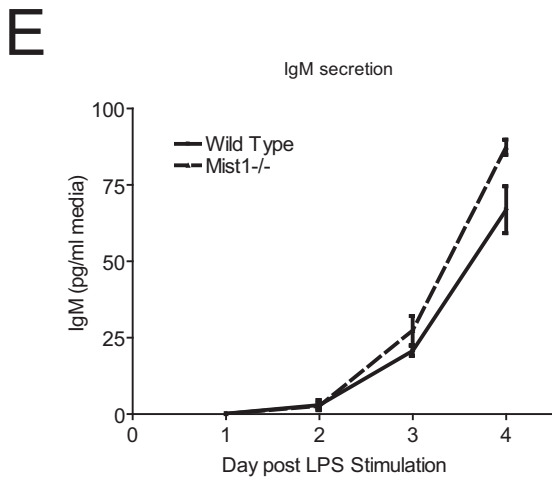

Supplement: figS1.pdf [file figS1.pdf]
